# Supplementary material
Source: MDPI journal article supplement (https://www.mdpi.com/2673-3994/2/4/32)
Supplement: s1 [file s1]

## Supplementary Material

### Towards biomass gasification enhanced by structured iron-based catalysts

Giovanna Ruoppolo and Gianluca Landi\*

Institute of Sciences and Technologies for Sustainable Energy and Mobility-CNR; P.le Tecchio 80, 80125 Naples, Italy; [giovanna.ruoppolo@stems.cnr.it](mailto:giovanna.ruoppolo@stems.cnr.it); [gianluca.landi@stems.cnr.it](mailto:gianluca.landi@stems.cnr.it)

\*Correspondence: [gianluca.landi@stems.cnr.it](mailto:gianluca.landi@stems.cnr.it); Tel.: +39-081-768-2235

Table of contents

Table S1: mean values and statistical parameters (standard deviation and error (calculated as standard deviation divided by mean value)) for each type of experiment.

**Table S1. Mean values and statistical parameters (standard deviation and error (calculated as standard deviation divided by mean value) for each type of experiment.**

| <b>No catalyst</b>                             | <b>Mean value</b> | <b>Standard deviation</b> | <b>Error</b> |
|------------------------------------------------|-------------------|---------------------------|--------------|
| CO <sub>2</sub>                                | 15.05             | 0.202                     | 1.3%         |
| CH <sub>4</sub>                                | 5.54              | 0.135                     | 2.4%         |
| CO                                             | 18.96             | 0.850                     | 4.5%         |
| H <sub>2</sub>                                 | 14.09             | 0.800                     | 5.7%         |
| C <sub>2</sub> H <sub>4</sub>                  | 1.32              | 0.030                     | 2.3%         |
| TAR                                            | 26.15             | 1.905                     | 7.3%         |
|                                                |                   |                           |              |
| <b>Powder catalyst (high contact time)</b>     |                   |                           |              |
| CO <sub>2</sub>                                | 6.28              | 0.265                     | 4.2%         |
| CH <sub>4</sub>                                | 4.30              | 0.126                     | 2.9%         |
| CO                                             | 22.66             | 0.501                     | 2.2%         |
| H <sub>2</sub>                                 | 27.67             | 0.400                     | 1.4%         |
| C <sub>2</sub> H <sub>4</sub>                  | 0.14              | 0.005                     | 3.6%         |
| TAR                                            | 8.10              | 0.400                     | 4.9%         |
|                                                |                   |                           |              |
| <b>Powder catalyst (low contact time)</b>      |                   |                           |              |
| CO <sub>2</sub>                                | 11.73             | 0.550                     | 4.7%         |
| CH <sub>4</sub>                                | 5.82              | 0.235                     | 4.0%         |
| CO                                             | 17.63             | 0.450                     | 2.6%         |
| H <sub>2</sub>                                 | 27.46             | 0.450                     | 1.6%         |
| C <sub>2</sub> H <sub>4</sub>                  | 1.40              | 0.060                     | 4.3%         |
| TAR                                            | 10.00             | 1.258                     | 12.6%        |
|                                                |                   |                           |              |
| <b>Structured catalyst (high contact time)</b> |                   |                           |              |
| CO <sub>2</sub>                                | 14.79             | 0.276                     | 1.9%         |
| CH <sub>4</sub>                                | 5.70              | 0.246                     | 4.3%         |
| CO                                             | 19.53             | 0.497                     | 2.5%         |
| H <sub>2</sub>                                 | 14.46             | 0.585                     | 4.0%         |
| C <sub>2</sub> H <sub>4</sub>                  | 0.49              | 0.040                     | 8.2%         |
| TAR                                            | 15.20             | 0.400                     | 2.6%         |
|                                                |                   |                           |              |
| <b>Structured catalyst (low contact time)</b>  |                   |                           |              |
| CO <sub>2</sub>                                | 13.76             | 0.450                     | 3.3%         |
| CH <sub>4</sub>                                | 5.56              | 0.250                     | 4.5%         |
| CO                                             | 18.85             | 0.601                     | 3.2%         |
| H <sub>2</sub>                                 | 14.19             | 0.700                     | 4.9%         |
| C <sub>2</sub> H <sub>4</sub>                  | 1.19              | 0.040                     | 3.4%         |
| TAR                                            | 21.50             | 1.756                     | 8.2%         |
